# Supplementary material for: Migration of cations in layered oxides for creating a highly active interface toward CO preferential oxidation
Source: Royal Society of Chemistry journal article supplement (doi:10.1039/d0ta11762e), 2021-01-01
Supplement: d0ta11762e1.pdf [file d0ta11762e1.pdf]

## Supporting Information

### **Migration of Cations in Layered Oxides for Creating Highly Active Interface toward CO Preferential Oxidation**

*Junfang Ding<sup>†</sup>, Zhibin Geng<sup>†</sup>, Liping Li<sup>†</sup>, Ye Wang<sup>†</sup>, Ying Zuo<sup>‡</sup>, Huixia, Li<sup>†</sup>, Min  
Yang<sup>†</sup>, and Guangshe Li<sup>\*†</sup>*

<sup>†</sup>State Key Laboratory of Inorganic Synthesis and Preparative Chemistry, College of  
Chemistry, Jilin University, Changchun 130012, P.R. China

<sup>‡</sup>Scientific Instrument Center, Shanxi University, Shanxi 030006, P.R. China

\*E-mail: [guangshe@jlu.edu.cn](mailto:guangshe@jlu.edu.cn).

## Table of Contents

| No. | Details                                                                                                                                                                                                                                                                                                 | Page No. |
|-----|---------------------------------------------------------------------------------------------------------------------------------------------------------------------------------------------------------------------------------------------------------------------------------------------------------|----------|
| 1   | <b>Figure S1</b> XRD patterns of the precursors CuCoO <sub>2</sub> (a) and CeO <sub>2</sub> (c); SEM image of CuCoO <sub>2</sub> (b); and TEM image of CeO <sub>2</sub> (d). Inset is SEM image of CeO <sub>2</sub> .                                                                                   | S-4      |
| 2   | <b>Figure S2</b> XRD patterns of the given samples along with the standard diffraction data for CeO <sub>2</sub> (JCPDS No. 34-0394) and for CuCoO <sub>2</sub> (JCPDS No. 74-1855).                                                                                                                    | S-5      |
| 3   | <b>Figure S3</b> (a) N <sub>2</sub> adsorption-desorption isotherms and (b) pore size distributions of samples.                                                                                                                                                                                         | S-6      |
| 4   | <b>Figure S4</b> SEM images of the samples: (a) 10%CeO <sub>2</sub> -CuCoO <sub>2</sub> ; (b) 30%CeO <sub>2</sub> -CuCoO <sub>2</sub> ; (c) 50%CeO <sub>2</sub> -CuCoO <sub>2</sub> ; (d) 70%CeO <sub>2</sub> -CuCoO <sub>2</sub> ; and (e) 90%CeO <sub>2</sub> -CuCoO <sub>2</sub> .                   | S-7      |
| 5   | <b>Figure S5.</b> (a) TEM image, (b) enlarged images of Figure a, (c) corresponding elemental mapping analysis in the area of (a), and HRTEM image of 10%CeO <sub>2</sub> -CuCoO <sub>2</sub> .                                                                                                         | S-8      |
| 6   | <b>Figure S6.</b> (a) TEM image, (b) enlarged images of Figure a, (c) HRTEM image, and FFT pattern in the rectangle region I, II of (c) for 30%CeO <sub>2</sub> -CuCoO <sub>2</sub> .                                                                                                                   | S-9      |
| 7   | <b>Figure S7.</b> (a) TEM image, (b) enlarged images of Figure a, (c) HRTEM image, and FFT pattern in the rectangle region I of (c) for 50%CeO <sub>2</sub> -CuCoO <sub>2</sub> .                                                                                                                       | S-10     |
| 8   | <b>Figure S8</b> (a) TEM image, and (b) HRTEM image of 90%CeO <sub>2</sub> -CuCoO <sub>2</sub> , FFT pattern in the rectangle region.                                                                                                                                                                   | S-11     |
| 9   | <b>Figure S9</b> XPS survey scans of the samples: (a) 10%CeO <sub>2</sub> -CuCoO <sub>2</sub> ; (b) 30%CeO <sub>2</sub> -CuCoO <sub>2</sub> ; (c) 50%CeO <sub>2</sub> -CuCoO <sub>2</sub> ; (d) 70%CeO <sub>2</sub> -CuCoO <sub>2</sub> ; and (e) 90%CeO <sub>2</sub> -CuCoO <sub>2</sub> .             | S-12     |
| 10  | <b>Figure S10</b> FT-IR spectra for all samples.                                                                                                                                                                                                                                                        | S-13     |
| 11  | <b>Figure S11</b> XPS spectra of the Cu 2 <i>p</i> for samples.                                                                                                                                                                                                                                         | S-14     |
| 12  | <b>Figure S12</b> Auger spectra (Cu LMM peak) of the samples: (a) 10%CeO <sub>2</sub> -CuCoO <sub>2</sub> ; (b) 30%CeO <sub>2</sub> -CuCoO <sub>2</sub> ; (c) 50%CeO <sub>2</sub> -CuCoO <sub>2</sub> ; (d) 70%CeO <sub>2</sub> -CuCoO <sub>2</sub> ; and (e) 90%CeO <sub>2</sub> -CuCoO <sub>2</sub> . | S-15     |
| 13  | <b>Figure S13</b> XPS spectra of the Co 2 <i>p</i> for samples.                                                                                                                                                                                                                                         | S-16     |
| 14  | <b>Figure S14</b> CO <sub>2</sub> selectivity for the samples with varied CeO <sub>2</sub> content.                                                                                                                                                                                                     | S-17     |
| 15  | <b>Figure S15</b> Reaction rates of the samples under CO-PROX conditions at 100 °C.                                                                                                                                                                                                                     | S-18     |

|    |                                                                                                                                                                                                         |      |
|----|---------------------------------------------------------------------------------------------------------------------------------------------------------------------------------------------------------|------|
| 16 | <b>Table S1</b> Comparison of catalytic performance in CO-PROX over 70%CeO <sub>2</sub> -CuCoO <sub>2</sub> and those catalysts reported in literatures.                                                | S-19 |
| 17 | <b>Figure S16</b> Selectivity to CO <sub>2</sub> as a function of CO conversion for given samples.                                                                                                      | S-20 |
| 18 | <b>Figure S17</b> CO conversion (a) and CO <sub>2</sub> selectivity (b) of 70%CeO <sub>2</sub> -CuCoO <sub>2</sub> sample in the presence of CO <sub>2</sub> and H <sub>2</sub> O.                      | S-21 |
| 19 | <b>Figure S18</b> CO <sub>2</sub> selectivity for given samples.                                                                                                                                        | S-22 |
| 20 | <b>Figure S19</b> CO <sub>2</sub> (CO) methanation over the given samples at 220 °C and 240 °C.                                                                                                         | S-23 |
| 21 | <b>Figure S20</b> DRIFTS spectra obtained for sample 50%CeO <sub>2</sub> -CuCoO <sub>2</sub> at given temperatures under CO-PROX conditions (1% CO, 1.25% O <sub>2</sub> and 50% H <sub>2</sub> in He). | S-24 |
| 22 | <b>References</b>                                                                                                                                                                                       | S-25 |

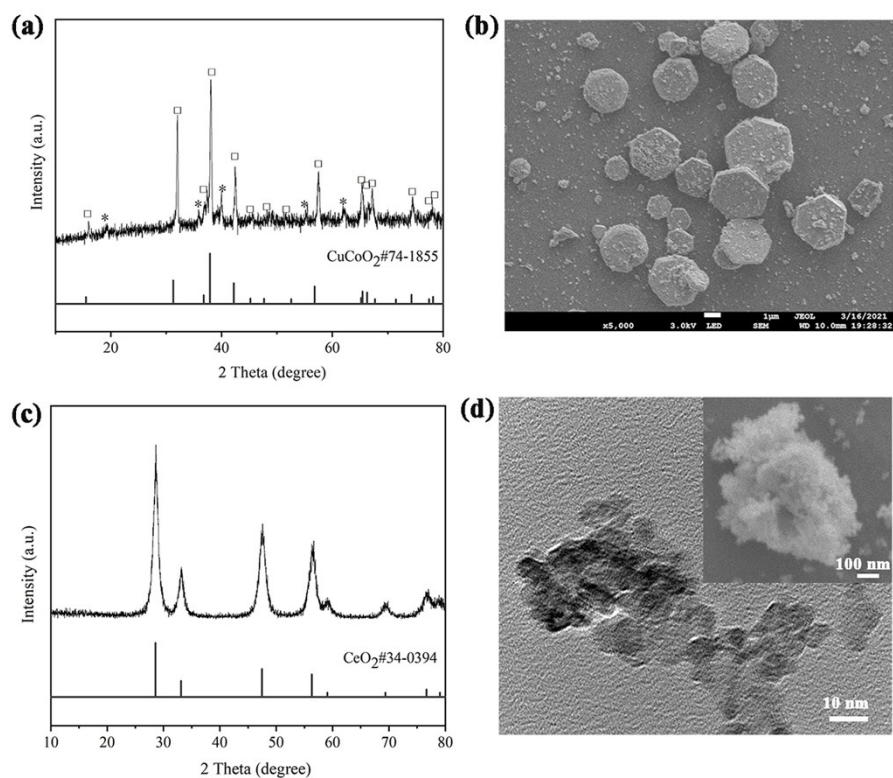

**Figure S1** XRD patterns of the precursors CuCoO<sub>2</sub> (a) and CeO<sub>2</sub> (c); SEM image of CuCoO<sub>2</sub> (b); and TEM image of CeO<sub>2</sub> (d). Inset is SEM image of CeO<sub>2</sub>.

As shown in Figure S1a, the synthesized precursors contain the majority of rhombohedral (3R) delafossite CuCoO<sub>2</sub> phase (indicated as an open square) and small amount of un-known impurity phase (an asterisk). The diffraction peaks at two theta of 28.6°, 33.2°, 47.5°, and 56.7° are attributed to the planes (111), (002), (022), and (113) of CeO<sub>2</sub> in a cubic fluorite structure, respectively. CuCoO<sub>2</sub> mainly composed of hexagonal plates and fragmented particles. The morphology of CeO<sub>2</sub> is rough spherical at a diameter about 6-7 nm, which agrees with the XRD data analysis.

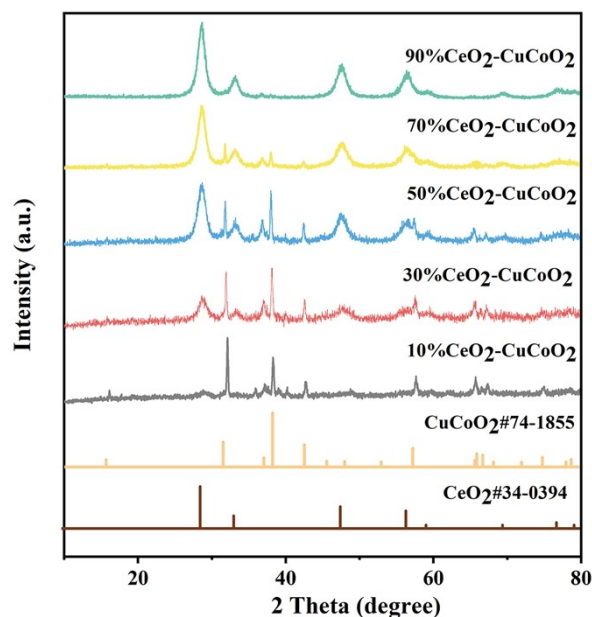

**Figure S2** XRD patterns of the given samples along with the standard diffraction data for CeO<sub>2</sub> (JCPDS No. 34-0394) and for CuCoO<sub>2</sub> (JCPDS No. 74-1855).

For 10% CeO<sub>2</sub>-CuCoO<sub>2</sub> sample as shown in Figure S2, the diffraction peaks were substantially the same as the precursors, except for both weak peaks at  $2\theta$  of 28.554° and 47.478° that are attributed to (111) and (220) crystalline planes of cubic-phase CeO<sub>2</sub> (JCPDS No. 34-0394), confirming that 10% CeO<sub>2</sub>-CuCoO<sub>2</sub> is mainly composed of CuCoO<sub>2</sub> with a small amount of CeO<sub>2</sub>. In XRD patterns of 30% CeO<sub>2</sub>-CuCoO<sub>2</sub> and 50% CeO<sub>2</sub>-CuCoO<sub>2</sub>, the intensities of the characteristic peaks of cubic-phase CeO<sub>2</sub> became stronger with the appearance of the peak located at 56.085° assigned to (222) crystalline planes of cubic-phase CeO<sub>2</sub>, corresponding to the higher mass fraction of CeO<sub>2</sub> in the as-prepared catalysts. When the content of CeO<sub>2</sub> grew higher to 70%, it can be clearly seen that the intensities of CuCoO<sub>2</sub> characteristic peaks suffered a sharp decline. In the XRD patterns of 90% CeO<sub>2</sub>-CuCoO<sub>2</sub>, peaks of CuCoO<sub>2</sub> were almost invisible, demonstrating the extremely low content of CuCoO<sub>2</sub>.

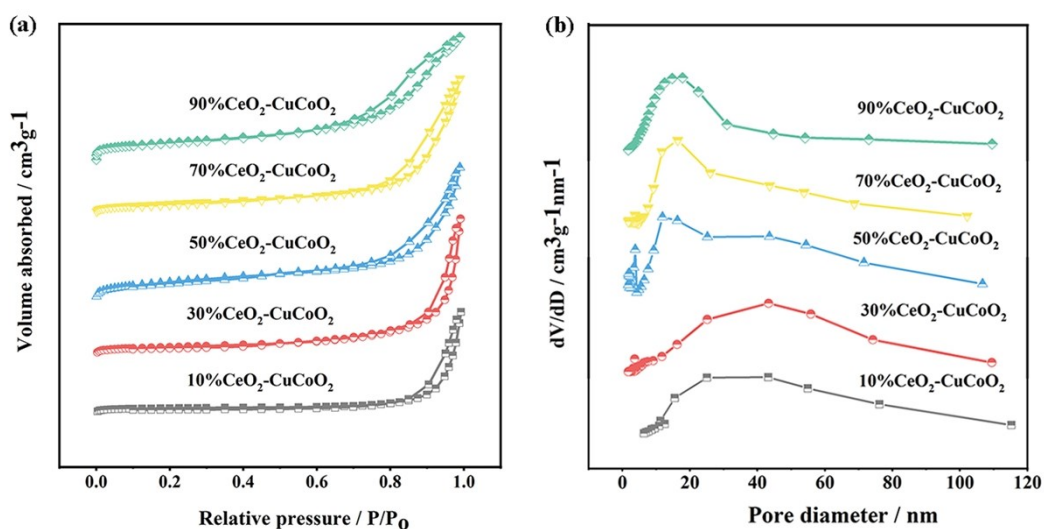

**Figure S3** (a) N<sub>2</sub> adsorption-desorption isotherms and (b) pore size distributions of samples.

The specific surface area and the corresponding Barrett-Joyner-Halenda (BJH) pore size distributions of the as-prepared samples were investigated by N<sub>2</sub> adsorption-desorption isotherms. As shown in Figure S3, all samples exhibited IV type isotherms with a H3 representative hysteresis loop, suggesting that the pores were mainly caused by the accumulation of small nanoparticles. From Table 1, it can be seen that with the increase of CeO<sub>2</sub> content, the surface areas of samples increase gradually. This observation can be explained in terms of a small size effect because the particle size of CeO<sub>2</sub> component is only about 6 nm. Meanwhile, BJH pore volume is also enhanced with CeO<sub>2</sub> content, and it is summarized in Table 1. The pore size distribution calculated from the desorption branch of the samples is presented in Figure 3b. The samples of 10%CeO<sub>2</sub>-CuCoO<sub>2</sub> and 30%CeO<sub>2</sub>-CuCoO<sub>2</sub> were mainly mesopores located at about 20-40 nm which was formed from the surface wall. The peaks of mesopore size distribution of 50%CeO<sub>2</sub>-CuCoO<sub>2</sub>, 70%CeO<sub>2</sub>-CuCoO<sub>2</sub> and 90%CeO<sub>2</sub>-CuCoO<sub>2</sub> shifted toward smaller pore width when compared with above two samples, which was due to the fact that the content of CeO<sub>2</sub> increased slightly and crystal grains of CeO<sub>2</sub> is much smaller than CuCoO<sub>2</sub>. This observation is in good agreement with adsorption-desorption isotherms, SEM and TEM results.

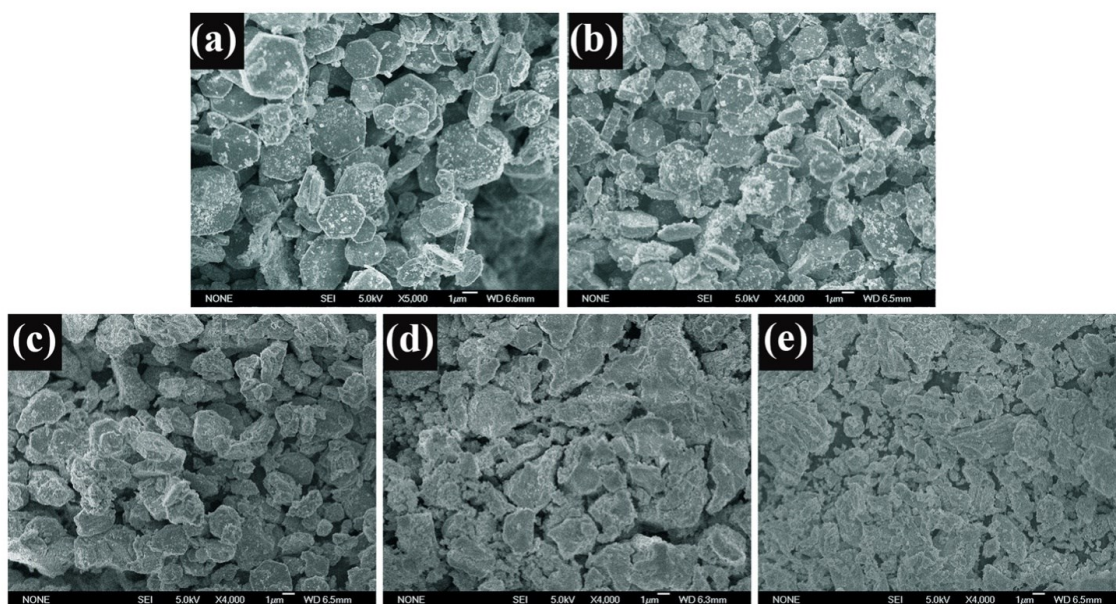

**Figure S4** SEM images of the samples: (a) 10%CeO<sub>2</sub>-CuCoO<sub>2</sub>; (b) 30%CeO<sub>2</sub>-CuCoO<sub>2</sub>; (c) 50%CeO<sub>2</sub>-CuCoO<sub>2</sub>; (d) 70%CeO<sub>2</sub>-CuCoO<sub>2</sub>; and (e) 90%CeO<sub>2</sub>-CuCoO<sub>2</sub>.

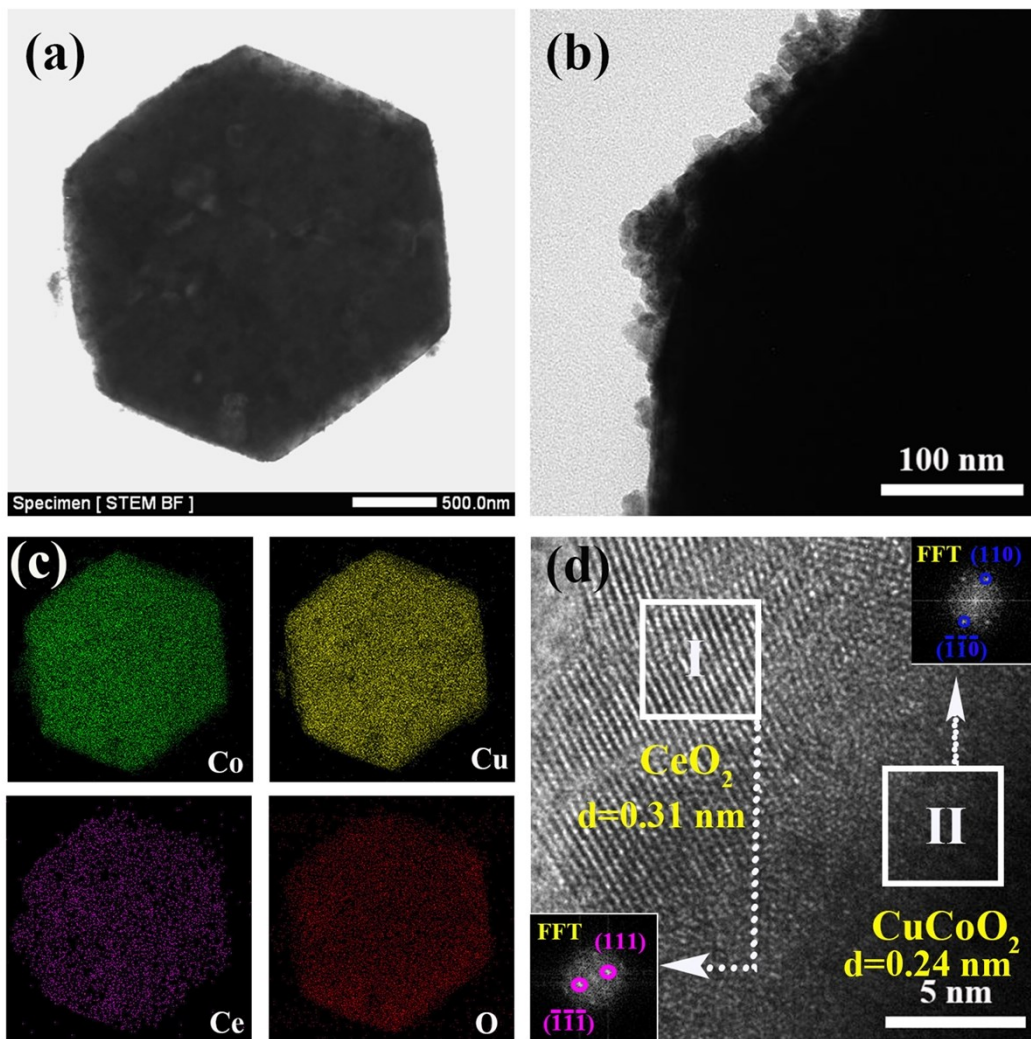

**Figure S5.** (a) TEM image, (b) enlarged images of Figure a, (c) corresponding elemental mapping analysis in the area of (a), and HRTEM image of 10%CeO<sub>2</sub>-CuCoO<sub>2</sub>.



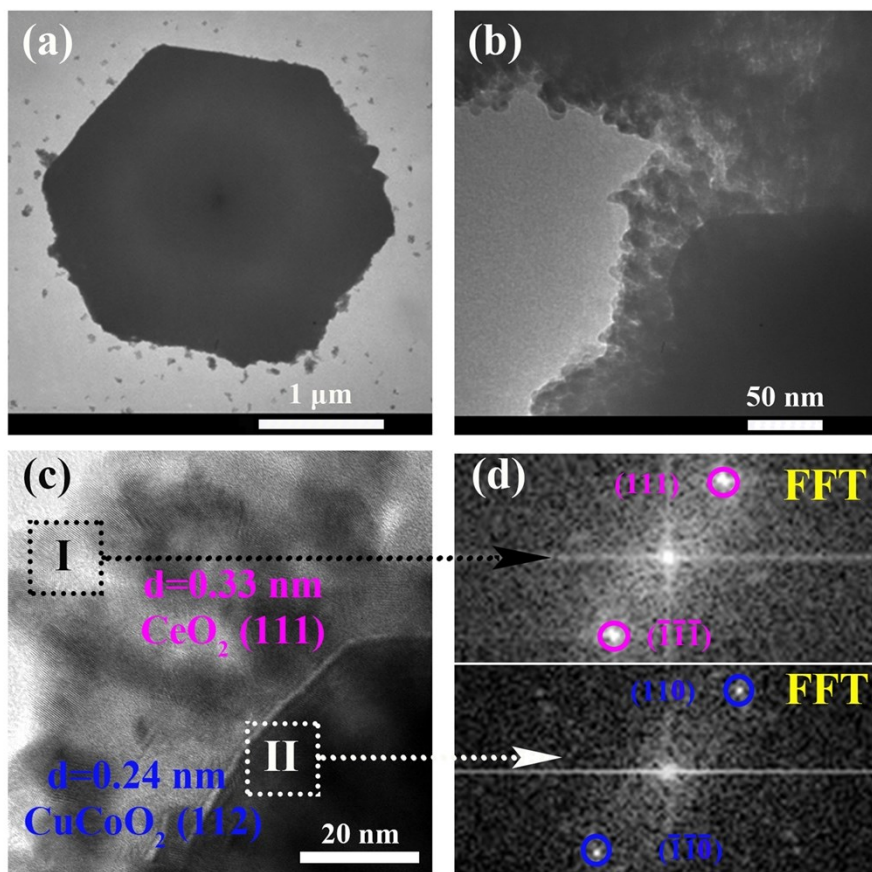

**Figure S6.** (a) TEM image, (b) enlarged images of Figure a, (c) HRTEM image, and FFT pattern in the rectangle region I, II of (c) for 30%CeO<sub>2</sub>-CuCoO<sub>2</sub>.

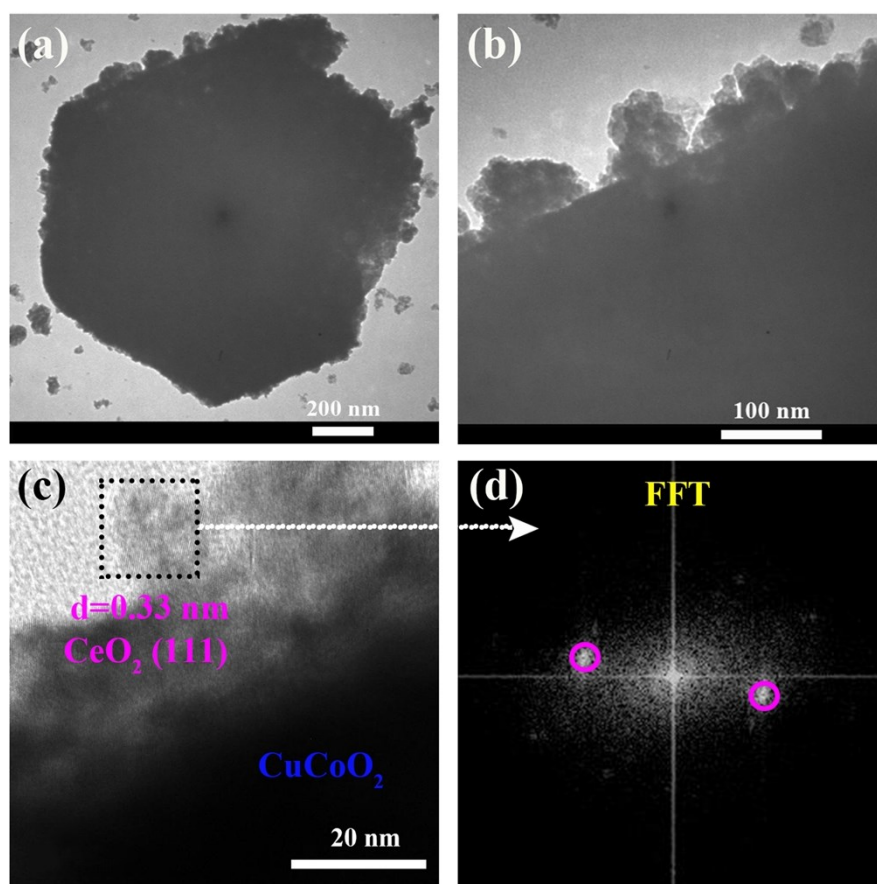

**Figure S7.** (a) TEM image, (b) enlarged images of Figure a, (c) HRTEM image, and FFT pattern in the rectangle region I of (c) for 50%CeO<sub>2</sub>-CuCoO<sub>2</sub>.

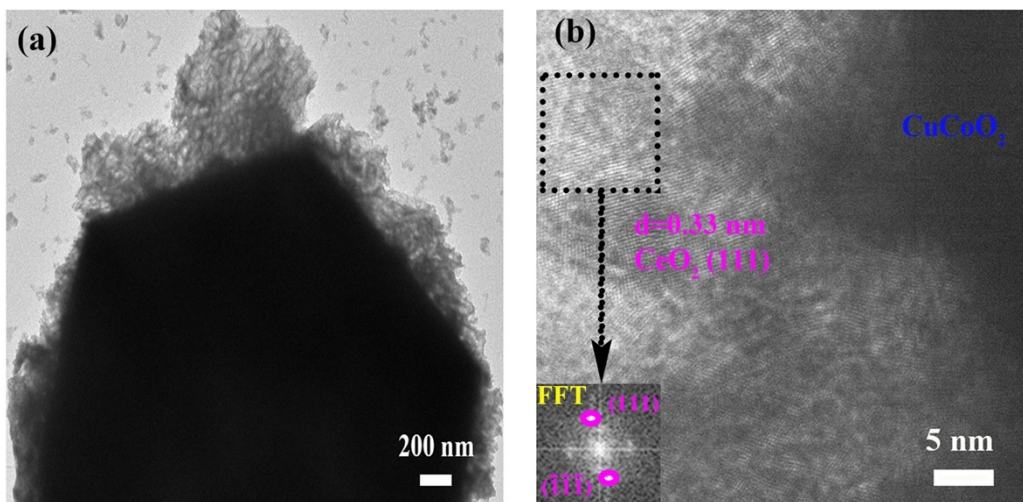

**Figure S8** (a) TEM image, and (b) HRTEM image of 90%CeO<sub>2</sub>-CuCoO<sub>2</sub>, FFT pattern in the rectangle region.

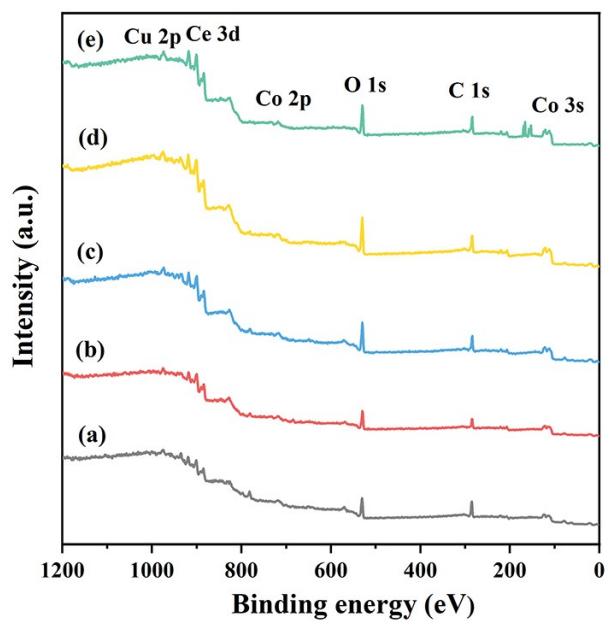

**Figure S9** XPS survey scans of the samples: (a) 10%CeO<sub>2</sub>-CuCoO<sub>2</sub>; (b) 30%CeO<sub>2</sub>-CuCoO<sub>2</sub>; (c) 50%CeO<sub>2</sub>-CuCoO<sub>2</sub>; (d) 70%CeO<sub>2</sub>-CuCoO<sub>2</sub>; and (e) 90%CeO<sub>2</sub>-CuCoO<sub>2</sub>.

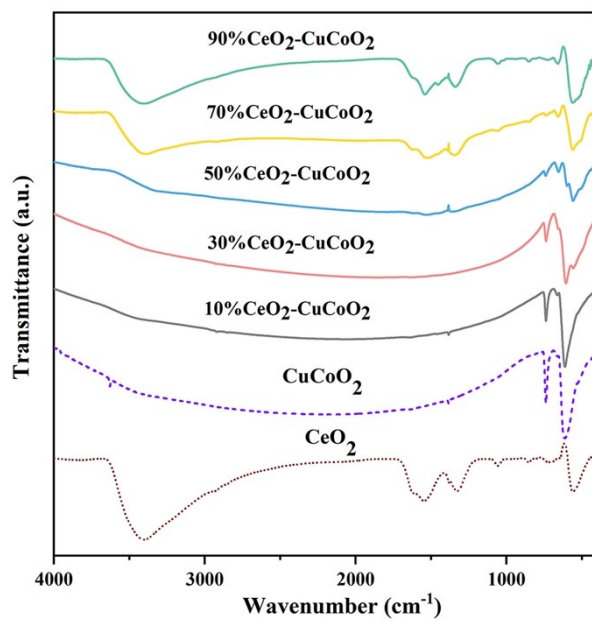

**Figure S10** FT-IR spectra for all samples.

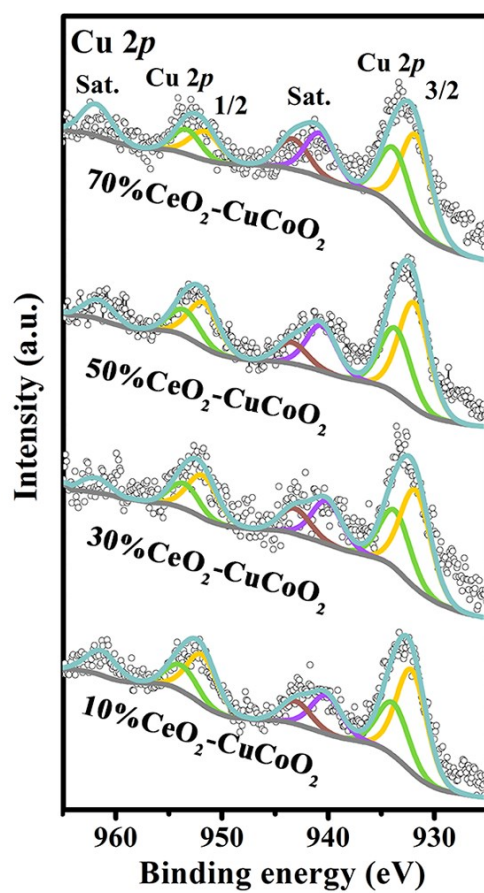

Figure S11 XPS spectra of the Cu 2p for samples.

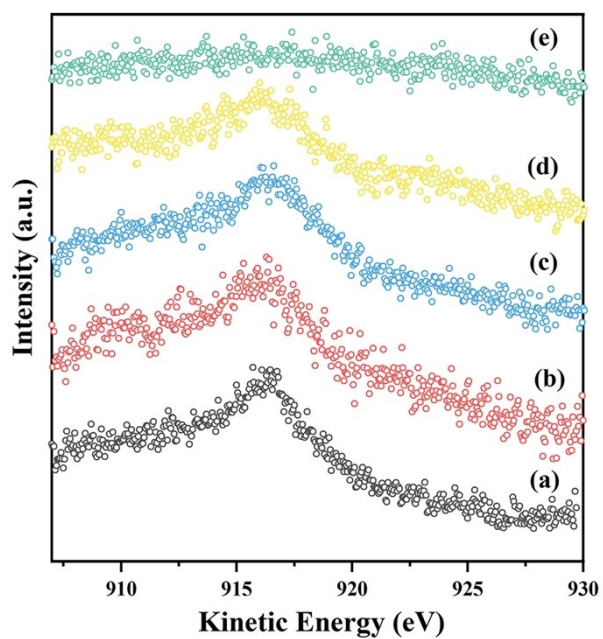

**Figure S12** Auger spectra (Cu LMM peak) of the samples: (a) 10%CeO<sub>2</sub>-CuCoO<sub>2</sub>; (b) 30%CeO<sub>2</sub>-CuCoO<sub>2</sub>; (c) 50%CeO<sub>2</sub>-CuCoO<sub>2</sub>; (d) 70%CeO<sub>2</sub>-CuCoO<sub>2</sub>; and (e) 90%CeO<sub>2</sub>-CuCoO<sub>2</sub>.

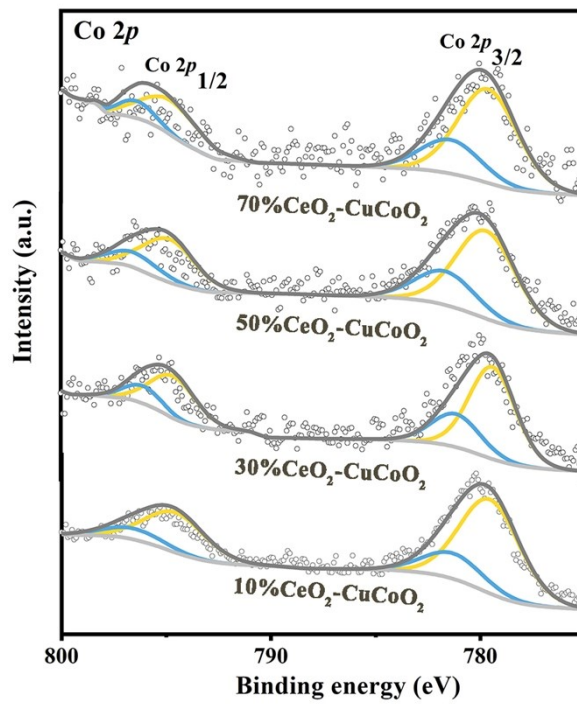

Figure S13 XPS spectra of the Co 2p for samples.



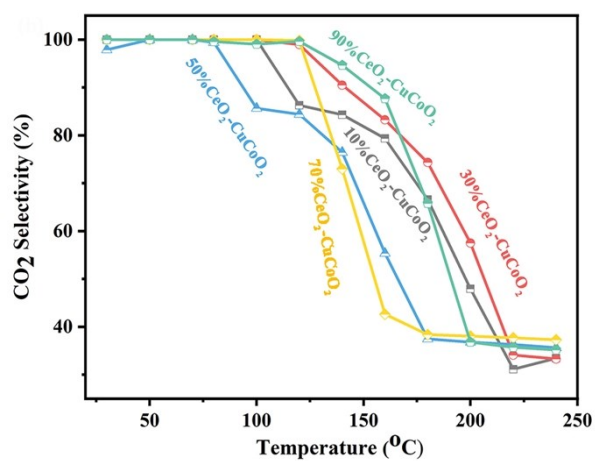

**Figure S14** CO<sub>2</sub> selectivity for the samples with varied CeO<sub>2</sub> content.

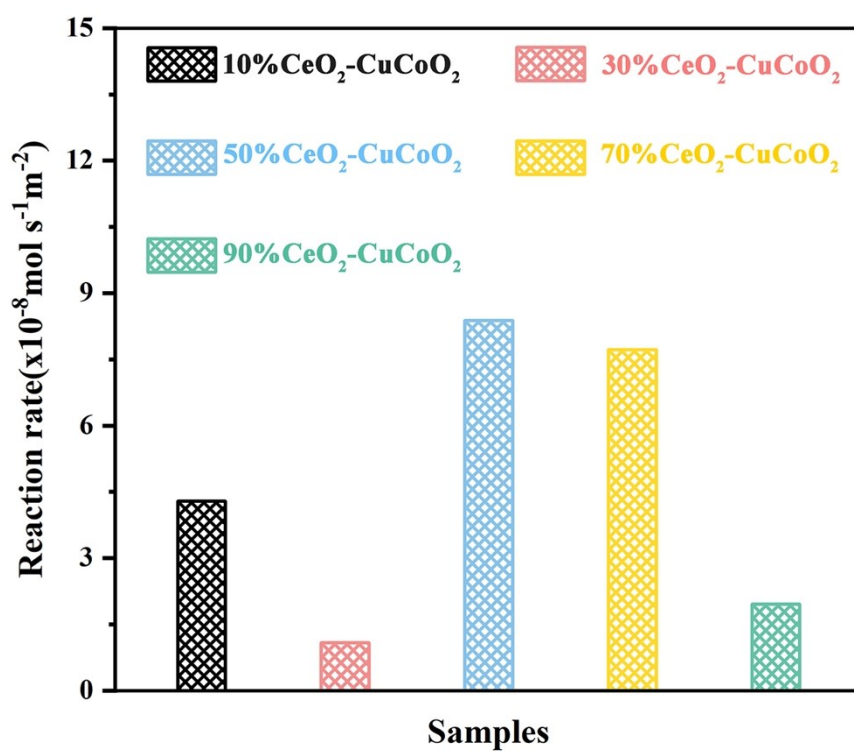

**Figure S15** Reaction rates of the samples under CO-PROX conditions at 100 °C.

**Table S1** Comparison of catalytic performance in CO-PROX over 70%CeO<sub>2</sub>-CuCoO<sub>2</sub> and those catalysts reported in literatures.

| Sample                                                                                  | Amount of catalyst (mg) | Space Velocity (ml·g <sub>cat</sub> <sup>-1</sup> ·h <sup>-1</sup> ) | Feed gas                                                                             | operation temperature window (CO conversion >95.0%) | Ref       |
|-----------------------------------------------------------------------------------------|-------------------------|----------------------------------------------------------------------|--------------------------------------------------------------------------------------|-----------------------------------------------------|-----------|
| 70%CeO <sub>2</sub> -CuCoO <sub>2</sub>                                                 | 50                      | 60 000                                                               | 1% CO, 1.25% O <sub>2</sub> , 50% H <sub>2</sub> , He balance                        | 120-240 °C                                          | This work |
| Co <sub>2.6</sub> Zn <sub>0.4</sub> O <sub>4</sub> /Al <sub>2</sub> O <sub>3</sub> -gly | 150                     | 40 000                                                               | 2% CO, 2% O <sub>2</sub> , 30% H <sub>2</sub> , He balance                           | 200-225                                             | 1         |
| Co-CuCZ                                                                                 | 300                     | 24 000                                                               | 1 % CO, 1 % O <sub>2</sub> , 50 % H <sub>2</sub> , He balance                        | 100-160 °C                                          | 2         |
| CuCe-Fe                                                                                 | 300                     | 16 000                                                               | 1 % CO, 1 % O <sub>2</sub> , 50 % H <sub>2</sub> , He balance                        | 100-180 °C                                          | 3         |
| 40%CeO <sub>2</sub> /CuMn <sub>2</sub> O <sub>4</sub>                                   | Undefined               | 80 000                                                               | 1% CO, 1.25% O <sub>2</sub> , 50% H <sub>2</sub> , 0.2% H <sub>2</sub> O, He balance | 175-200 °C                                          | 4         |
| 80%CeO <sub>2</sub> /CuMn <sub>2</sub> O <sub>4</sub>                                   | Undefined               | 80 000                                                               | 1% CO, 1.25% O <sub>2</sub> , 50% H <sub>2</sub> , 0.2% H <sub>2</sub> O, He balance | 175-200 °C                                          | 4         |
| CuCoCe30                                                                                | 500                     | 12 000                                                               | 1 % CO, 1 % O <sub>2</sub> , 50% H <sub>2</sub> , balance N <sub>2</sub>             | 126-189 °C                                          | 5         |
| CoCuCe                                                                                  | 100                     | 12 000                                                               | 1% CO, 1% O <sub>2</sub> , 60% H <sub>2</sub> , balance He                           | 140-200 °C                                          | 6         |
| 1/10Fe <sub>(N)</sub> -CuCZ.                                                            | 300                     | 24 000                                                               | 1% CO, 1% O <sub>2</sub> , 50% H <sub>2</sub> , balance He                           | 100-160 °C                                          | 7         |
| CoFe <sub>2</sub> O <sub>4</sub>                                                        | 150                     | 40 000                                                               | 1% CO, 1% O <sub>2</sub> , 60% H <sub>2</sub> , balance He                           | ----                                                | 8         |
| 10COCE                                                                                  | 150                     | 22 000                                                               | 1.25 % CO, 1.25 % O <sub>2</sub> , 50 % H <sub>2</sub> , He balance                  | 140-190 °C                                          | 9         |
| CuNiCeO                                                                                 | 150                     | 40 000                                                               | 1 % CO, 1 % O <sub>2</sub> , 60% H <sub>2</sub> , balance He                         | 125-150 °C                                          | 10        |
| Ce <sub>0.87</sub> Cu <sub>0.03</sub> Co <sub>0.10</sub> O <sub>2-δ</sub>               | Undefined               | 48 000                                                               | 1 % CO, 1 % O <sub>2</sub> , 50% H <sub>2</sub> , balance N <sub>2</sub>             | 180-250 °C                                          | 11        |
| CeO <sub>2</sub> -Co <sub>3</sub> O <sub>4</sub> /CuO (CAT-350)                         | Undefined               | 40 000                                                               | 1 % CO, 1 % O <sub>2</sub> , 50% H <sub>2</sub> , balance N <sub>2</sub>             | 145-225 °C                                          | 12        |
| FCZCu77                                                                                 | Undefined               | 22 000                                                               | 1.25 % CO, 1.25 % O <sub>2</sub> , 50 % H <sub>2</sub> , He balance                  | 115-165 °C                                          | 13        |
| Co-Mn-O-np                                                                              | 100                     | 15 000                                                               | 1 % CO, 1 % O <sub>2</sub> , 50% H <sub>2</sub> , balance Ar                         | 150-225 °C                                          | 14        |
| 30%Co/CeO <sub>2</sub>                                                                  | 200                     | 15 000                                                               | 1 % CO, 1 % O <sub>2</sub> , 50% H <sub>2</sub> , balance Ar                         | 150-225 °C                                          | 15        |

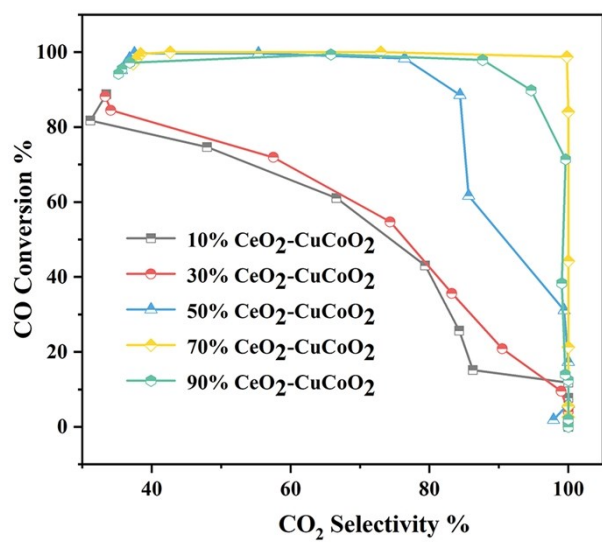

**Figure S16** Selectivity to CO<sub>2</sub> as a function of CO conversion for given samples.

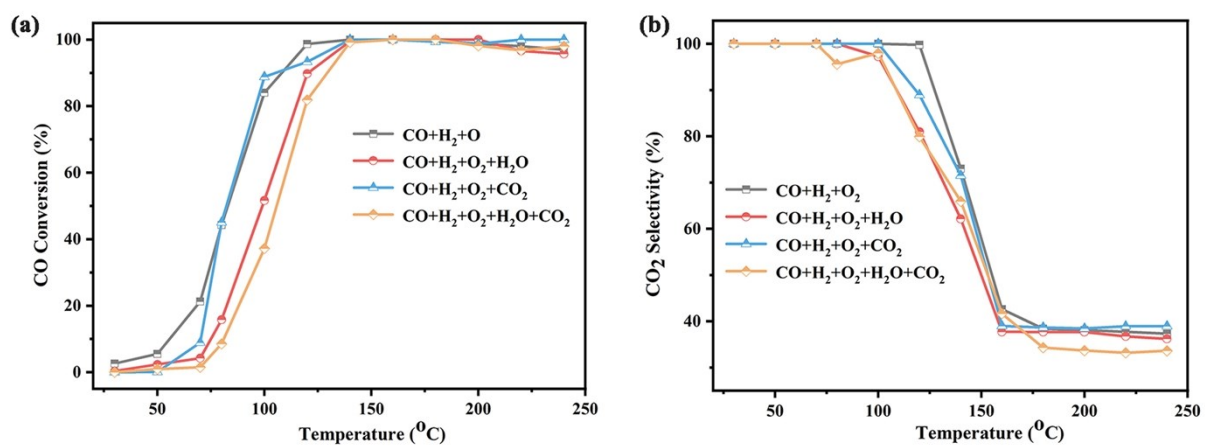

**Figure S17** CO conversion (a) and CO<sub>2</sub> selectivity (b) of 70%CeO<sub>2</sub>-CuCoO<sub>2</sub> sample in the presence of CO<sub>2</sub> and H<sub>2</sub>O.

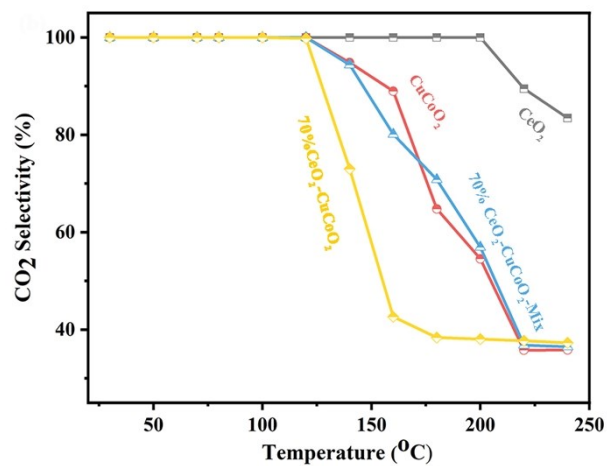

**Figure S18** CO<sub>2</sub> selectivity for given samples.

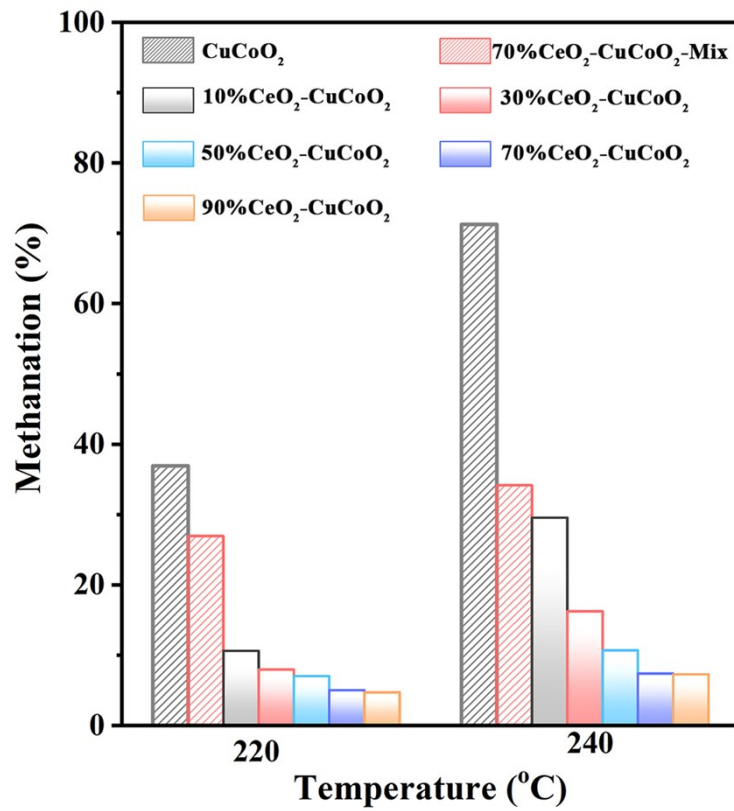

**Figure S19** CO<sub>2</sub> (CO) methanation over the given samples at 220 °C and 240 °C.

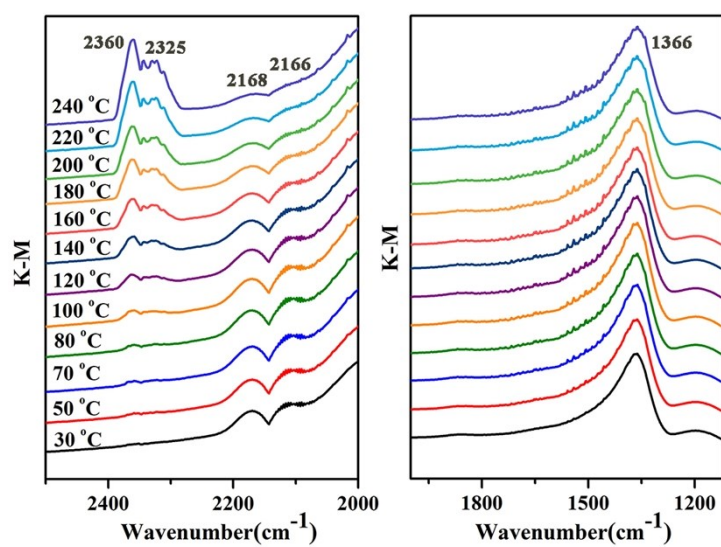

**Figure S20** DRIFTS spectra obtained for sample 50%CeO<sub>2</sub>-CuCoO<sub>2</sub> at given temperatures under CO-PROX conditions (1% CO, 1.25% O<sub>2</sub> and 50% H<sub>2</sub> in He).



## References:

1. G. Grzybek, K. Ciura, J. Gryboś, P. Indyka, A. Davó-Quiñonero, D. Lozano-Castelló, A. Bueno-Lopez, A. Kotarba, and Z. Sojka, *J Phys Chem C.*, 2019, **123**, 20221-20232.
2. J. Lu, J. Wang, Q. Zou, Y. Zhao, J. Fang, S. He, D. He and Y. Luo, *J. Alloys Comp.*, 2019, **784**, 1248-1260.
3. J. Lu, J. Wang, Q. Zou, D. He, L. Zhang, Z. Xu, S. He and Y. Luo, *ACS Catal.*, 2019, **9**, 2177-2195.
4. A. Elmhamdi, L. Pascual, K. Nahdi and A. Martínez-Arias, *Appl. Catal. B Environ.*, 2017, **217**, 1-11.
5. Y. Chen, D. Liu, L. Yang, M. Meng, J. Zhang, L. Zheng, S. Chu and T. Hu, *Chem. Eng. J.*, 2013, **234**, 88-98.
6. J. Ayastuy, E. Fernández-Puertas, M. González-Marcos and M. Gutiérrez-Ortiz, *Int. J. Hydrogen Energy.*, 2012, **37**, 7385-7397.
7. J. Wang, C. Han, X. Gao, J. Lu, G. Wan, D. He, R. Chen, K. Chen, S. He and Y. Luo, *J. Power Sources.*, 2017, **343**, 437-445.
8. C. Chagas, E. Souza, M. Carvalho, R. Martins and M. Schmal, *Appl. Catal. A General.*, 2016, **519**, 139-145.
9. A. Arango-Diaz, J. Cecilia, J. Marrero-Jerez, P. Nuñez, J. Jiménez-Jiménez and E. Rodríguez-Castellón, *Ceram. Int.*, 2016, **42**, 7462-7474.
10. C. Chagas, E. Souza, R. Manfro, S. Landi, M. Souza and M. Schmal, *Appl. Catal. B Environ.*, 2016, **182**, 257-265.

11. T. Cwele, N. Mahadevaiah, S. Singh and H. Friedrich, *Appl. Catal. B Environ.*, 2016, **182**, 1-14.
12. S. Zeng, Q. Wang, Y. Wang, Y. Fei, N. Liu, S. Ding and H. Su, *J. Nanosci. Nanotech.*, 2016, **16**, 962-966.
13. E. Moretti, L. Moretti, A. Talon, P. Riello, A. Molina and E. Rodríguez-Castellón, *Appl. Catal. B Environ.*, 2015, **168-169**, 385-395.
14. Z. Zhao, J. Lin and G. Wang, *AIChE J.*, 2015, **61**, 239-252.
15. C. Yan, H. Chen, R. Hu, S. Huang, W. Luo, C. Guo, M. Li and W. Li, *Int. J. Hydrogen Energy.*, 2014, **39**, 18695-18701.
